# Supplementary material
Source: PubMed Central journal article supplement (PMC3186879)
Supplement: NIHMS318515-supplement-1.pdf [file NIHMS318515-supplement-1.pdf]

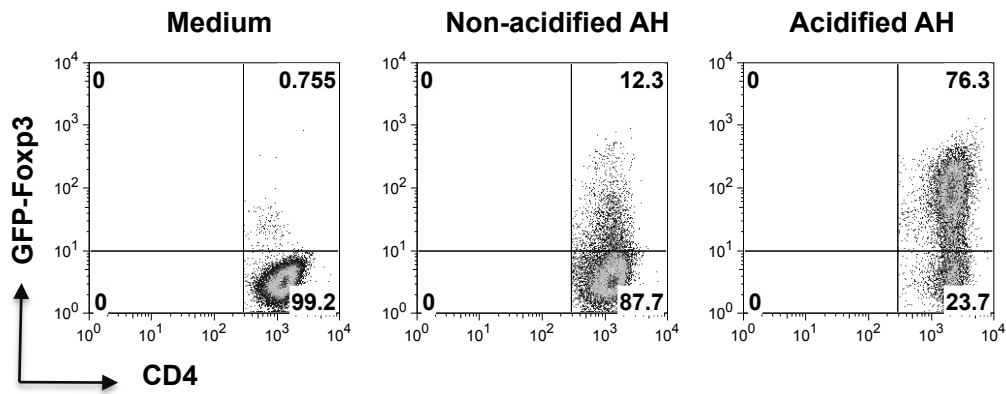

### Supplementary Figure 1:

#### Transient acidification of AH enhances Treg conversion.

CD4<sup>+</sup> T cells from naïve FoxP3-GFP C57BL/6 reporter mice were activated with anti-CD3/CD28 in the presence of IL-2 and were treated with acid-activated AH or non-activated AH (20% v/v). FoxP3 expression was examined after 72 h by flow cytometry. Data are representative of four repeat experiments. Note that the experiment is done in serum-free medium, therefore, the only source of TGF- $\beta$  is the AH.
