# Supplementary material
Source: PubMed Central journal article supplement (PMC3186879)
Supplement: NIHMS318515-supplement-2.pdf [file NIHMS318515-supplement-2.pdf]

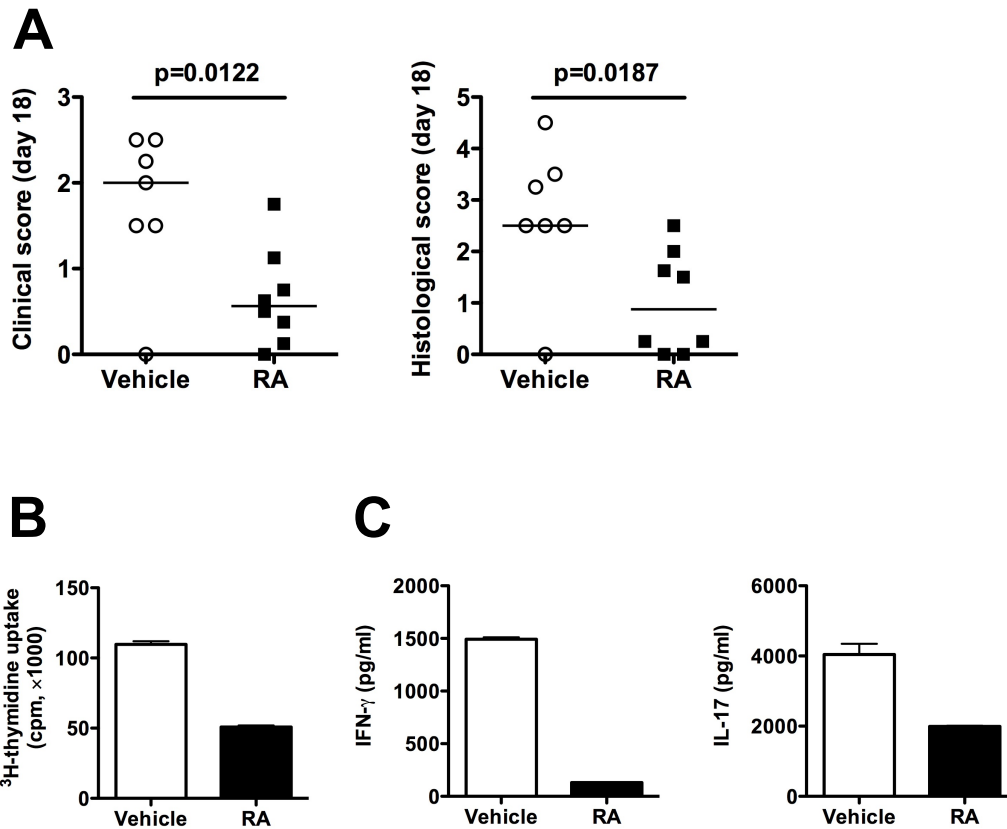

## Supplementary Fig 2:

### Treatment of mice with RA ameliorates EAU and its associated immunological responses.

B10.RIII mice were immunized with IRBP peptide 161-180 (5  $\mu$ g/mouse) in CFA. Retinoic acid treatment (400  $\mu$ g/mouse by gavage in soybean oil, three times a week) was started one week before immunization and continued for 18 days after immunization. (A) Disease was scored by Fundus examination (left) or by histopathology on H&E stained sections (right). (B & C) Lymph node cells draining the site of immunization (inguinal and iliac) were stimulated with 50  $\mu$ g/ml peptide 161-180 for 72 h to evaluate the cell proliferation by <sup>3</sup>H-thymidine uptake (B), or to determine cytokine production in culture supernatants by ELISA (C). Data are representative of three repeat experiments.
